# Supplementary material for: The elicitation of patient and physician preferences for calculating consumer-based composite measures on hospital report cards: results of two discrete choice experiments
Source: Springer Nature journal article supplement (doi:10.1007/s10198-023-01650-2), 2023-12-15
Supplement: MOESM1 [file 10198_2023_1650_MOESM1_ESM.pdf]

**The elicitation of patient and physician preferences for calculating consumer-based  
composite measures on Hospital Report Cards: Results of two discrete choice  
experiments**

*Supplemental material*

**Supplemental material 1.** Results from literature review and qualitative research steps for the patients related DCE experiment (selected measures are indicated in *italics*)

| Hospital information criteria             | Relevance of information for hospital choice |                                             |             |                                     |
|-------------------------------------------|----------------------------------------------|---------------------------------------------|-------------|-------------------------------------|
|                                           | Literature Review <sup>#</sup>               | Mailed survey before qualitative interviews |             | Qualitative interviews <sup>#</sup> |
|                                           |                                              | Mean                                        | SD          |                                     |
| 1 Distance (home to hospital)             | High                                         | 3.05                                        | 1.16        | Middle                              |
| 2 Ownership                               | High                                         | 2.65                                        | 1.01        | Low                                 |
| 3 University hospital/teaching hospital   | High                                         | 3.45                                        | 1.07        | Middle                              |
| 4 <i>The number of cases treated</i>      | <i>Middle</i>                                | <i>4.50</i>                                 | <i>0.74</i> | <i>High</i>                         |
| 5 <i>Endocert Certificate</i>             | <i>High</i>                                  | <i>4.75</i>                                 | <i>0.43</i> | <i>Middle</i>                       |
| 6 Mortality rate                          | Middle                                       | 3.95                                        | 1.28        | Low                                 |
| 7 <i>Postoperative complication rate</i>  | <i>High</i>                                  | <i>4.45</i>                                 | <i>0.74</i> | <i>High</i>                         |
| 8 General complication rate               | High                                         | 4.05                                        | 0.86        | Low                                 |
| 9 <i>Confirmed diagnosis rate*</i>        | -                                            | <i>4.80</i>                                 | <i>0.51</i> | <i>Middle</i>                       |
| 10 <i>Prevention of falls measures*</i>   | -                                            | <i>4.30</i>                                 | <i>0.64</i> | <i>Middle</i>                       |
| 11 <i>Mobility at hospital discharge*</i> | -                                            | <i>4.35</i>                                 | <i>0.79</i> | <i>Middle</i>                       |
| 12 <i>Inability to walk at discharge*</i> | -                                            | <i>4.25</i>                                 | <i>0.94</i> | <i>Middle</i>                       |
| 13 1-year revision rate                   | Middle                                       | 3.90                                        | 1.18        | Low                                 |

\* Those measures were added based on the German hospital quality report 2020 but were not identified by means of the literature review.

<sup>#</sup> Relevance was rated as low, middle, or high based on study results or semi-structured interviews.

**Supplemental material 2.** Importance of different information items for the hospital decision among patients (n = 322) and referring physicians (n = 187)

(p value was calculated using t tests)

| Information items for the hospital decision | Importance of different information items<br>[Mean (SD)]* |                                      |       | Most important information item <sup>§</sup><br>[n (%)] |                                      |
|---------------------------------------------|-----------------------------------------------------------|--------------------------------------|-------|---------------------------------------------------------|--------------------------------------|
|                                             | Patients<br>(n = 299-314)                                 | Referring<br>physicians<br>(n = 187) | p     | Patients<br>(n = 265)                                   | Referring<br>physicians<br>(n = 181) |
| Confirmed diagnosis (hip surgery) rate      | 4.65 (0.80)                                               | 3.67 (1.23)                          | <.001 | 118 (44.5%)                                             | 13 (7.2%)                            |
| Endocert Certificate                        | 4.09 (1.03)                                               | 3.05 (1.16)                          | <.001 | 32 (12.1%)                                              | 9 (5.0%)                             |
| The number of cases treated                 | 4.35 (0.90)                                               | 4.09 (0.98)                          | .002  | 62 (23.4%)                                              | 65 (35.9%)                           |
| Complication rate                           | 4.54 (0.81)                                               | 4.19 (1.06)                          | <.001 | 18 (6.8%)                                               | 53 (29.3%)                           |
| Mobility at hospital discharge              | 4.60 (0.73)                                               | 3.31 (1.18)                          | <.001 | 35 (13.2%)                                              | 4 (2.2%)                             |
| Prevention of falls measures                | 4.29 (0.97)                                               | n.a.                                 | n.a.  | 0 (0.0%)                                                | n.a.                                 |
| 1-year revision surgery rate                | n.a.                                                      | 4.00 (1.21)                          | n.a.  | n.a.                                                    | 37 (20.4%)                           |

\* Importance of items is rated on a 1–5 scale [1 not all important; 5 extremely important]

§ Which information was most important for your hospital choice?

**Supplemental material 3.** Parameters estimated from the multinomial logit (MNL) models (Discrete Choice Experiment; patients vs. physicians)

| Attributes                        | Patients (n = 322) |        |       |       | Referring physicians (n = 187) |       |       |       |
|-----------------------------------|--------------------|--------|-------|-------|--------------------------------|-------|-------|-------|
|                                   | Coeff.             | SE     | z     | p     | Coeff.                         | SE    | z     | p     |
| Confirmed diagnosis rate          | 0.437              | 0.033  | 13.24 | <.001 | 0.390                          | 0.052 | 7.54  | <.001 |
| Endocert Certificate              | 0.341              | 0.033  | 10.23 | <.001 | 0.310                          | 0.047 | 6.62  | <.001 |
| The number of cases treated       | 0.547              | 0.036  | 15.07 | <.001 | 0.696                          | 0.051 | 13.61 | <.001 |
| Complication rate                 | 0.560              | 0.037  | 15.08 | <.001 | 0.546                          | 0.050 | 10.83 | <.001 |
| Mobility at hospital discharge    | 0.551              | 0.036  | 15.15 | <.001 | 0.236                          | 0.046 | 5.14  | <.001 |
| Prevention of falls measures      | 0.431              | 0.035  | 12.35 | <.001 | n.a.                           | n.a.  | n.a.  | n.a.  |
| 1-year revision surgery rate      | n.a.               | n.a.   | n.a.  | n.a.  | 1.014                          | 0.053 | 19.10 | <.001 |
| <i>Model constant (Intercept)</i> | 0.325              | -0.045 | -7.29 | <.001 | n.a.                           | n.a.  | n.a.  | n.a.  |
